# Supplementary material for: UNC-6 (netrin) stabilizes oscillatory clustering of the UNC-40 (DCC) receptor to orient polarity
Source: PubMed Central journal article supplement — J Cell Biol. 2014 Sep 1;206(5):619–33. doi: 10.1083/jcb.201405026 (PMC4151141; doi:10.1083/jcb.201405026), 2014-09-01
Supplement: supp_jcb.201405026_JCB_201405026_sm.pdf [file supp_jcb.201405026_JCB_201405026_sm.pdf]

Wang et al., <http://www.jcb.org/cgi/content/full/jcb.201405026/DC1>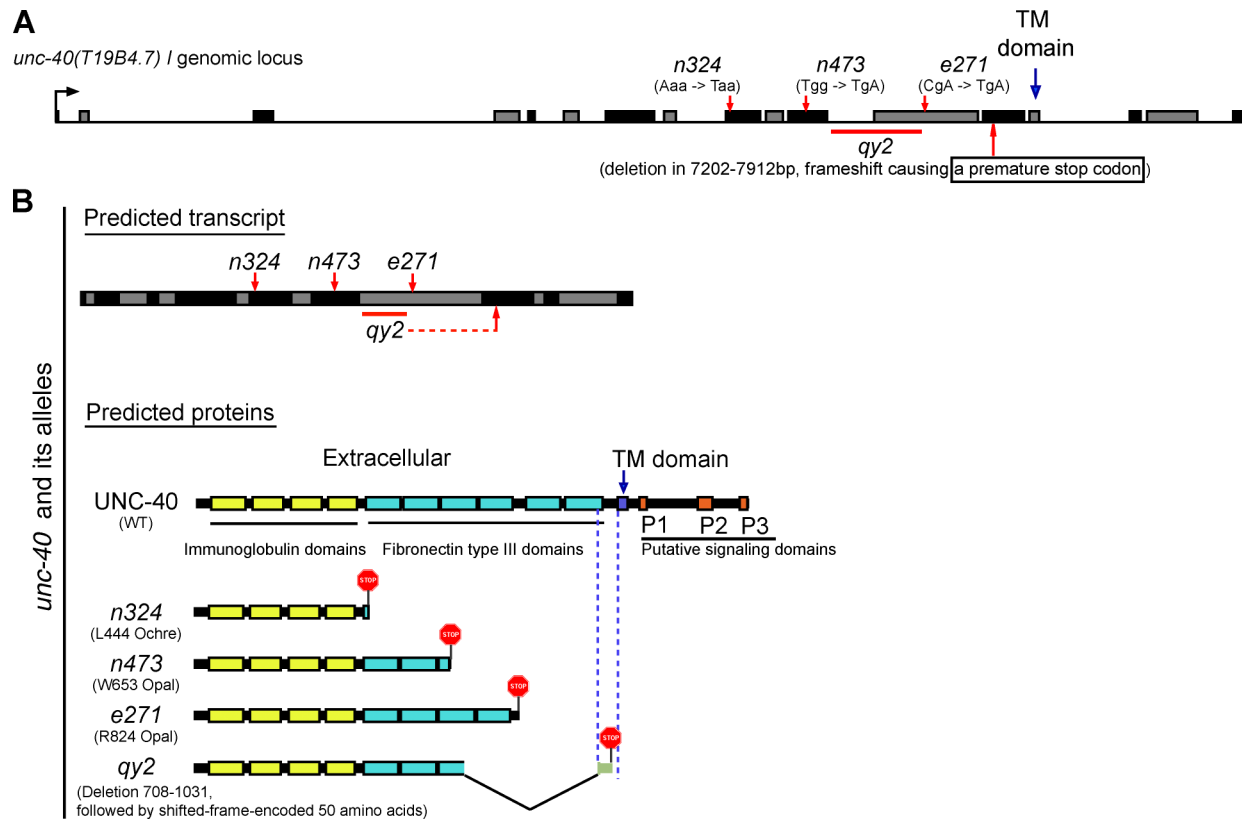

Figure S1. **Generation and characterization of *unc-40* alleles.** (A and B) Schematic diagram of *unc-40* mutant alleles. (A) The genomic locus of *unc-40* shows the exons (alternating black and dark gray boxes) and introns (lines between boxes). The locations of putative *unc-40*-null alleles are indicated with red arrows for nonsense mutations and a red line for the deletion. The blue arrow indicates the location of the TM domain. (B) The diagram shows the corresponding locations (red arrows) of these *unc-40* alleles in the predicted transcript of the *unc-40* gene, and the predicted UNC-40 proteins encoded by the wild type and each of the *unc-40* mutant alleles.

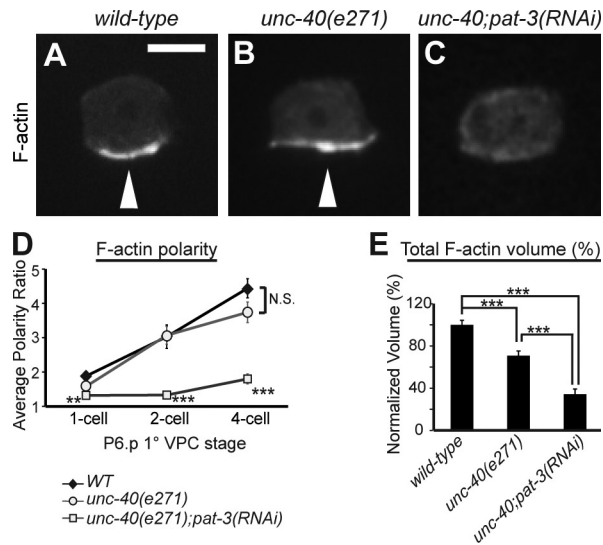

Figure S2. **INA-1/PAT-3 (integrin) mediates *unc-40*-independent polarizing and F-actin-promoting activity at the invasive cell membrane.** Anterior is left; ventral is down. (A–C) All animals were examined at the P6.p four-cell stage. (A) In wild-type animals, F-actin polarizes to the invasive cell membrane (arrowhead). Bar, 5  $\mu$ m. (B) In *unc-40* mutants, there was a reduction, but not loss, of F-actin at the invasive cell membrane of the AC in all cases (arrowhead). (C) RNAi targeting *pat-3*, the  $\beta$  subunit of integrin heterodimer  $\alpha$ INA-1/  $\beta$ PAT-3, reduced F-actin volume and polarization at the invasive membrane in *unc-40* mutants. (D) Quantification of F-actin polarity in the ACs of wild-type (closed diamonds), *unc-40* (open circles), and *unc-40;pat-3(RNAi)* (open squares) animals at the P6.p one-, two-, and four-cell stages ( $n \geq 15$  for each stage per genotype). Significant differences relative to wild-type animals are indicated. (E) Quantification of the total F-actin volume in the ACs in wild type (as a control for normalization), *unc-40*, and *unc-40;pat-3(RNAi)* at the P6.p four-cell stage ( $n \geq 15$  per genotype). \*,  $P < 0.05$ ; \*\*,  $P < 0.01$ ; \*\*\*,  $P < 0.001$ . N.S., no significant difference ( $P > 0.05$ , Student's  $t$  test). Error bars represent  $\pm$  SEM.

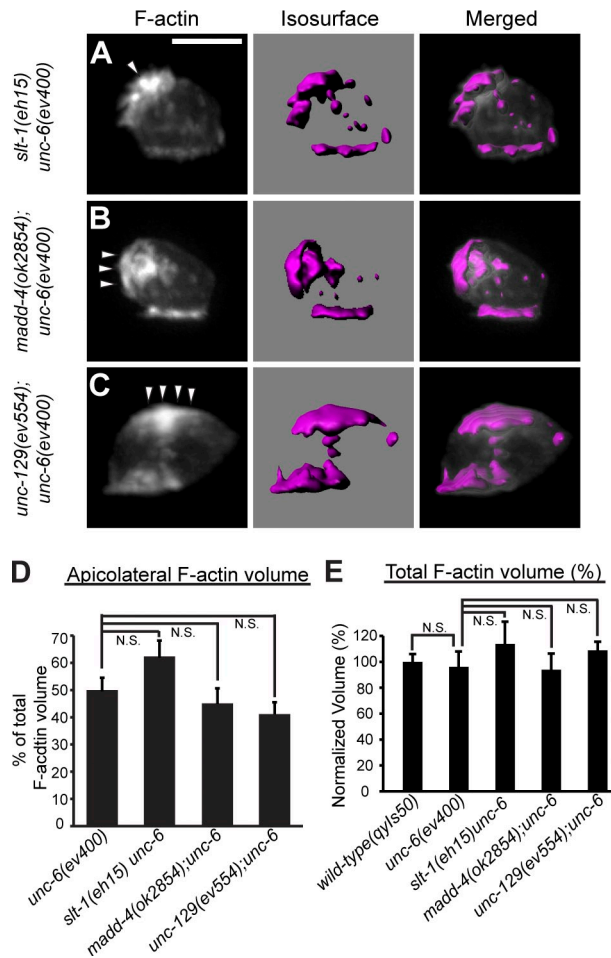

Figure S3. **SLT-1, MADD-4, and UNC-129 do not activate UNC-40.** Anterior is left; ventral is down. (A–C) Images show 3D reconstructions generated from confocal z stacks. Fluorescence (left), corresponding dense F-actin network rendered with isosurfaces (middle), and an overlay (right) are shown. Similar to *unc-6* single mutants, F-actin formed and was mislocalized (arrowheads) to the apical and lateral membranes of the AC in *slt-1 unc-6*, *madd-4; unc-6*, and *unc-129; unc-6* double mutants. Bar, 5  $\mu$ m. (D) The percentage of the volume of F-actin that localized apicolaterally at the P6.p four-cell stage ( $n \geq 12$  per genotype). (E) Quantification of the total F-actin volume in the AC in wild-type animals (control for normalization) and in each of the mutant backgrounds at the P6.p four-cell stage ( $n \geq 12$  per genotype).

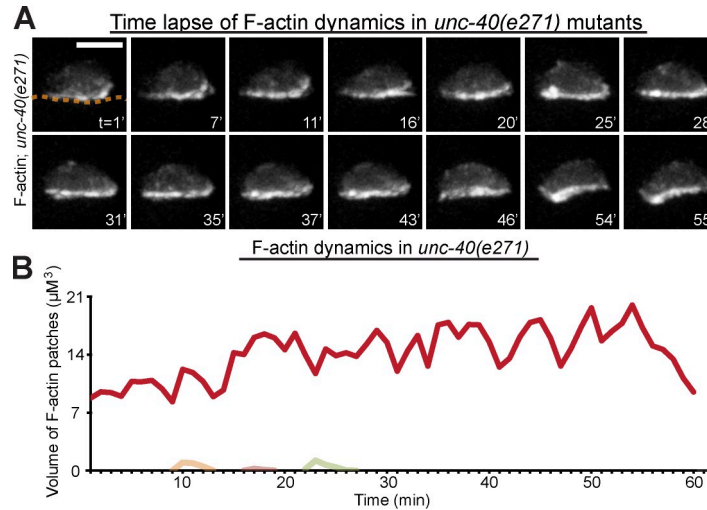

Figure S4. **F-actin is stably polarized in *unc-40* mutants.** Anterior is left; ventral is down. (A) Time-lapse series shows F-actin dynamics in an *unc-40* mutant AC. Time points are indicated in minutes. The broken line denotes the position of the basement membrane in the first frame. Bar, 5  $\mu\text{m}$ . (B) The volume of individual F-actin patches over time within the AC. Each colored line represents a distinct F-actin patch. The red line represents the dominant patch in the basal membrane of the AC. Similar results were observed in  $n = 10/10$  *unc-40* mutants.

Table S1. **Primer sequences and templates used for PCR fusions and cloning**

| Primer sequence (5' → 3')       | Primer type                                                    | Amplicon                                                                 | Template                                           |
|---------------------------------|----------------------------------------------------------------|--------------------------------------------------------------------------|----------------------------------------------------|
| TAATGTGAGTTAGCTCACTCATTAGG      | Forward                                                        | <i>cdh-3</i> promoter                                                    | pPD107.94/mk62-63                                  |
| AACGATGGATACGCTAACAACTTGG       | Forward nested                                                 | <i>cdh-3</i> promoter                                                    | pPD107.94/mk62-63                                  |
| TTTCTGAGCTCGGTACCTCCAAG         | Reverse                                                        | <i>cdh-3</i> promoter                                                    | pPD107.94/mk62-63                                  |
| ATGAGTAAAGGAGAAGAAGAACTTTTCAC   | Forward                                                        | GFP                                                                      | pPD95.81 (GFP)                                     |
| GGAAACAGTTATGTTTGGTATATTGGG     | Reverse nested                                                 | GFP                                                                      | pPD95.81 (GFP)                                     |
| AAGGGCCCCGTACGGCCGACTA          | Reverse                                                        | GFP                                                                      | pPD95.81 (GFP)                                     |
| TTGTATAGTTCATCCATGCCATGTG       | Reverse for GFP extension to N terminus of protein of interest | GFP                                                                      | Plasmid <i>cdh-3 &gt; GFP</i>                      |
| /5Phos/TTAGCGGCTCCACCAAGTTC     | Forward                                                        | <i>unc-40</i> ( $\Delta$ FN4/5) for <i>unc-40</i> ( $\Delta$ FN4/5)::GFP | Plasmid <i>unc-40::GFP</i>                         |
| /5Phos/AAGTGTTCTGTTCTTTATCTTGCC | Reverse                                                        | <i>unc-40</i> ( $\Delta$ FN4/5) for <i>unc-40</i> ( $\Delta$ FN4/5)::GFP | Plasmid <i>unc-40::GFP</i>                         |
| TACGGCCGACTAGTAGGAAA            | Reverse for fusion                                             | <i>unc-40</i> ( $\Delta$ FN4/5) for <i>unc-40</i> ( $\Delta$ FN4/5)::GFP | Plasmid <i>unc-40::GFP</i>                         |
| AATACGTAATGATCACATCAGTATTGCG    | Forward                                                        | <i>unc-6::nlg-1</i> TM                                                   | Plasmid <i>unc-6 &gt; unc-6::nlg-1</i> TM::mCherry |
| AAGGTACCCCGTTCTTGTGCGATGCGGATA  | Reverse                                                        | <i>unc-6::nlg-1</i> TM                                                   | Plasmid <i>unc-6 &gt; unc-6::nlg-1</i> TM::mCherry |
| AAGCTTATGATTTGCGACATTTCCGG      | Forward                                                        | <i>unc-40</i> cDNA for <i>unc-40::mCherry</i>                            | N2 cDNA                                            |
| AACCCGGGCTTATCCATACTCGTCTCAA    | Reverse                                                        | <i>unc-40</i> cDNA for <i>unc-40::mCherry</i>                            | N2 cDNA                                            |

Table S2. **Extrachromosomal array and integrated strain generation**

| Strain designation | PCR fusion or plasmids                                       | Injection concentration | Coinjection marker                      |
|--------------------|--------------------------------------------------------------|-------------------------|-----------------------------------------|
| qyEx257            | <i>zmp-5 &gt; unc-6::nlg-1</i> TM::GFP <sup>a</sup>          | ng/ $\mu\text{l}$       | <i>unc-119+</i> , <i>myo-2 &gt; GFP</i> |
| qyls155            | <i>cdh-3 &gt; unc-40</i> ( $\Delta$ FN4/5)::GFP <sup>b</sup> | 10                      | <i>unc-119+</i> , <i>myo-2 &gt; GFP</i> |
| qyls262            | <i>cdh-3 &gt; unc-40::mCherry</i> <sup>b</sup>               | 10                      | <i>unc-119+</i>                         |

<sup>a</sup>Plasmid.

<sup>b</sup>PCR fusion product.

Table S3. Primers used in the screen for *unc-40(qy2)* deletion mutant

| Primer sequence (5' → 3') | Primer type             | <i>unc-40</i> genomic location of the amplicon |
|---------------------------|-------------------------|------------------------------------------------|
| AGTGAGCAGTGCCGAAGAAG      | Forward (outer primer)  | Region I (4,129–5,345 bp)                      |
| CGACAAGTGATAGCCCAGT       | Reverse (outer primer)  | Region I (4,129–5,345 bp)                      |
| CGTACACCTATACGTCCTT       | Reverse (poison primer) | Region I (4,129–5,345 bp)                      |
| GTAGAAGGTGCTGGGAAGAG      | Forward (poison primer) | Region I (4,129–5,345 bp)                      |
| GCGCTGTACATGTGACTACA      | Forward (inner primer)  | Region I (4,129–5,345 bp)                      |
| CGATAGAAGCACGTGAGACA      | Reverse (inner primer)  | Region I (4,129–5,345 bp)                      |
| TGTCTCACGTGCTTCTATCG      | Forward (outer primer)  | Region II (5,301–6,694 bp)                     |
| AGGTTGTCCTCCACTTGGTG      | Reverse (outer primer)  | Region II (5,301–6,694 bp)                     |
| GCAGCCACTGATGATGAATC      | Reverse (poison primer) | Region II (5,301–6,694 bp)                     |
| CCTCAGGAGTTCCAATGACT      | Forward (poison primer) | Region II (5,301–6,694 bp)                     |
| ACTGGGCTATACACTTGTGCG     | Forward (inner primer)  | Region II (5,301–6,694 bp)                     |
| GCTCCAACGGATGTCAATCG      | Reverse (inner primer)  | Region II (5,301–6,694 bp)                     |
| CGATTGACATCCGTTGGAGC      | Forward (outer primer)  | Region III (6,654–8,226 bp)                    |
| GTAGTCCTTCCACAGTAGCC      | Reverse (outer primer)  | Region III (6,654–8,226 bp)                    |
| GCTGGTGGAAAGCCATGATAC     | Reverse (poison primer) | Region III (6,654–8,226 bp)                    |
| GGATGGGGATTGAGTGTCC       | Forward (poison primer) | Region III (6,654–8,226 bp)                    |
| CACCAAGTGAGGACAACCT       | Forward (inner primer)  | Region III (6,654–8,226 bp)                    |
| GTCTCGGTGCTATTCACGTA      | Reverse (inner primer)  | Region III (6,654–8,226 bp)                    |
| TACGTGAATAGCACCGAGAC      | Forward (outer primer)  | Region IV (8,184–9,554 bp)                     |
| GTGACTACAGCCTTGGCTCT      | Reverse (outer primer)  | Region IV (8,184–9,554 bp)                     |
| CCTATTCCACCTCCACTTCC      | Reverse (poison primer) | Region IV (8,184–9,554 bp)                     |
| GGTCTTGGAGGTCCACCTAA      | Forward (poison primer) | Region IV (8,184–9,554 bp)                     |
| GGCTACTGTGGAAGGACTAC      | Forward (inner primer)  | Region IV (8,184–9,554 bp)                     |
| ACTAATGCTCAACCGGCTC       | Reverse (inner primer)  | Region IV (8,184–9,554 bp)                     |

Video 1. **F-actin dynamics in wild-type, *unc-40*, and *unc-6* mutant ACs.** The time lapse shows F-actin (visualized with *cdh-3 > mCherry::moeABD* in grayscale [left] and isosurface renderings in magenta [right]) in the *C. elegans* AC. In wild-type and *unc-40* mutants, F-actin is dynamic, but localized tightly to the basal cell membrane. In contrast, in *unc-6* mutants, F-actin localizes in dynamic clusters that form and then break down in all membrane domains of the cell. Images in movies were created from 3D reconstructions generated from confocal z stacks (CSU-10 spinning disc confocal microscope; Yokogawa Electric Corporation). Frames were acquired at 1-min intervals for a total of 60 min. The movies correspond to animals shown in Fig. S4 (A and B) and Fig. 4 D, respectively. Bar, 5  $\mu$ m. Anterior is left and ventral is down.

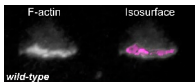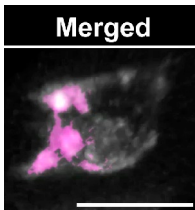

Video 2. **F-actin colocalizes with UNC-40 in *unc-6* mutants.** The time lapse shows that UNC-40::GFP (left) and F-actin (*cdh-3 > mCherry::moeABD*; middle) have persistent colocalization (highlighted in magenta, right; colocalization merged with UNC-40::GFP, far right) in the *C. elegans* AC's apical and lateral membranes in *unc-6(ev400)* mutants. Frames were acquired at 1-min intervals for a total of 75 min using a spinning disc confocal microscope (CSU-10; Yokogawa Electric Corporation). Imaris colocalization function (Coloc) was used to set a threshold for each fluorophore in reconstructed 3D images. The voxels containing both GFP and mCherry signal were considered colocalized. Bar, 5  $\mu$ m.

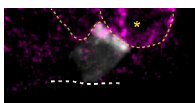

Video 3. **Dorsally localized UNC-6 orients and stabilizes UNC-40 in *unc-6* mutants.** The time lapse shows that ectopic membrane-tethered UNC-6 (*zmp-5 > unc-6::nlg-1 TM::GFP*; magenta) expressed in the dorsal *C. elegans* uterine cells (yellow broken lines; the asterisk indicates the cell with high constant expression of UNC-6) stably orients F-actin (grayscale; white arrow) to the AC's apical cell membrane in contact with UNC-6 in *unc-6(ev400)*. Frames were acquired at 1-min intervals for a total of 58 min using a spinning disc confocal microscope (CSU-10; Yokogawa Electric Corporation). The basement membrane is indicated with a white broken line. Bar, 5  $\mu$ m.

Video 4. **UNC-40 reorients F-actin toward a changing source of UNC-6.** The time lapse shows an AC initially directing polarity (visualized with the F-actin probe *cdh-3 > mCherry::moeABD*; grayscale) toward a dorsal *C. elegans* uterine cell expressing membrane-tethered UNC-6 (magenta; orange arrow). When the AC made contact with a new source of localized UNC-6 on a neighboring anterior dorsal uterine cell, a polarized response (yellow arrow) was directed toward this new source of UNC-6. Further, as UNC-6 protein was lost on the posterior dorsal uterine cell, polarity was lost here (orange arrowhead). The basement membrane is indicated with a white broken line. Frames were acquired at 1-min intervals for a total of 72 min using a spinning disc confocal microscope (CSU-10; Yokogawa Electric Corporation). The movie covers the time series shown in Fig. 6 (D and E). Bar, 5  $\mu$ m.

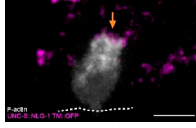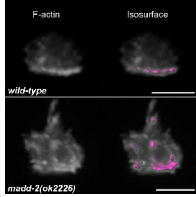

Video 5. **MADD-2 promotes UNC-40-mediated F-actin polarization toward UNC-6.** The time lapse shows F-actin (visualized with *cdh-3 > mCherry::moeABD* in grayscale [left] and overlaid with isosurface renderings in magenta [right]) in the *C. elegans* AC. In a representative wild-type animal, F-actin was dynamic but consistently polarized to the basal AC membrane. In contrast, in a *madd-2* animal, transient F-actin patches were mislocalized to the apical and lateral AC membrane. Frames were acquired at 1-min intervals for a total of 60 min using a spinning disc confocal microscope (CSU-10; Yokogawa Electric Corporation). The movies cover the time series shown in Fig. 8 (B and E, respectively). Bars, 5  $\mu$ m.
